# Supplementary material
Source: Research Square preprint supplement (doi:10.21203/rs.3.rs-8925027/v1)
Supplement: Supplementary file 1 [file 89cef262917657232e729f83.docx]

**Implementation of Medical Ethics and Data Protection in Healthcare Practice: A Cross-Sectional Study from Georgia**

**Introduction**
This survey is developed and administered with the support of the **University of Georgia** and **Avicenna – Batumi Medical University**, in alignment with international ethical and methodological standards. The primary aim is to assess and enhance the quality of healthcare service delivery in medical institutions.

**Research Objective**

The primary objective of this study is to explore how healthcare professionals and institutions in Georgia identify, manage, and resolve ethical dilemmas in clinical practice, and how data protection policies are understood and implemented in accordance with national and international standards. The survey aims to assess current institutional practices related to ethical decision-making, patient rights, and data confidentiality, while identifying existing gaps and areas for improvement. Findings will inform the development of targeted recommendations to enhance ethical governance and data protection frameworks within medical institutions.

**Principal Investigators**

- Associate Professor Lela Shengelia
- Associate Professor Sulkhan Inaishvili

**Research assistant** Nino Grdzelidze

**Funding Source**

Not applicable.

**Estimated Completion Time**

Approximately 15 minutes.

**Confidentiality and Data Use**

This is an anonymous survey. No personally identifiable information will be collected or stored during the completion of the questionnaire, and individual respondents cannot be identified in any way. All responses will be treated as strictly confidential and will be used exclusively for the purpose of evaluating and improving healthcare service quality.

The data collected may be utilized for statistical analysis and may contribute to academic publications, research reports, conference presentations, or scholarly articles. Anonymity and confidentiality will be strictly maintained throughout all stages of the research process.

**Informed Consent Statement**

*I hereby acknowledge that I understand participation in this survey does not entail any financial compensation. I have the right to ask any questions I may have and may contact the researchers at any time, now or in the future, should I require further information.*

*I confirm that I have been adequately informed about the content and purpose of this questionnaire, including its format, instructions for completion, and applicable conditions.*

*I am aware that I may withdraw from the survey at any stage without any consequences. I also understand that I have the right to request that my data be blocked, corrected, updated, deleted, or destroyed in accordance with relevant data protection legislation.*

*By ticking the appropriate checkbox or proceeding to the next section of the questionnaire, I confirm my voluntary participation in this study.*

*I consent to the processing of the data I provide within the framework of applicable personal data protection laws, and I declare that the information submitted is accurate to the best of my knowledge.*

*I further agree that my responses may be used for the stated academic and research purposes in the specified manner, if necessary.*

For additional questions regarding this research, please contact Associate Professor Lela Shengelia.
**Contact:** +995 591 706 794 | **Email:** l.shengelia@ug.edu.ge
**Address:** 77a M. Kostava St., Tbilisi, Georgia 0171 | [www.ug.edu.ge](http://www.ug.edu.ge/)

- I have read and agree
- I have read and do not agree

**Part 1: General Information**

1. Hospital name:
2. Hospital address:
3. Contact person:
4. Email address:
5. Phone number:
6. Position:

**Part 2: Management and Resolution of Ethical Dilemmas**

**2.1** How often do you encounter ethical dilemmas?

- Very rarely
- Rarely
- Occasionally
- Often
- Very often

**2.2** Categories of Ethical Dilemmas – Please mark how frequently you face each issue:

| **Issue** | **Very Rarely** | **Rarely** | **Occasionally** | **Often** | **Very Often** |
| --- | --- | --- | --- | --- | --- |
| New diagnostic/treatment methods |  |  |  |  |  |
| Social inequality or restriction of patient rights |  |  |  |  |  |
| Patient education |  |  |  |  |  |
| Involuntary hospitalization |  |  |  |  |  |
| Disagreements over performance evaluation |  |  |  |  |  |
| Poor working conditions in department |  |  |  |  |  |
| Patient's right to refuse treatment |  |  |  |  |  |
| Waiting time for diagnostics or therapy |  |  |  |  |  |
| Technical problems due to universal insurance |  |  |  |  |  |
| Stopping treatment in terminal cases |  |  |  |  |  |

**2.3** What do you do when facing an ethical dilemma?

- Discuss with management
- Discuss with colleagues
- Consult medical council
- Consult ethics committee
- Seek legal advice
- Mediation or public discussion
- Make an independent decision

**2.4** Does your institution have an SOP for resolving ethical dilemmas?

- Yes
- I don't know
- No

**2.5** Can you recall a case where ethical problem resolution was necessary?

- Yes
- I don’t know
- No

**2.6** Have you ever contacted the ethics committee?

- Yes
- I don’t know
- No

**Part 3: Implementation of Data Protection Law**

**3.1** Are you aware of the data protection law applicable to your hospital?

- Yes
- No

**3.2** Does your hospital have data protection measures in place for patient information?

- Yes
- No
- I don’t know

**Part 4: Surgical Operations and Blood Transfusion**

**4.1** Are there special protocols for data protection in surgical operations?

- Yes
- I don’t know
- No

**4.2** In cases of blood transfusion, how is patient consent for data collection and sharing documented?

- Written consent
- Verbal consent
- Electronic consent
- Other (please specify)

**Part 5: Hospitalization in Pediatric Care**

**5.1** What data protection measures are available during pediatric hospitalization?

- Encrypted records
- Restricted access
- Regular audits
- Other (please specify)

**5.2** How is sensitive information protected during pediatric hospitalization?

- Secured databases
- Staff training
- Parental consent procedures
- Other (please specify)

**Part 6: Incident and Precedent Reporting**

**6.1** Do you have a system for reporting data breach incidents?

- Yes
- No
- I don’t know

**6.2** How often do you conduct audits to ensure compliance with data protection regulations?

- Monthly
- Quarterly
- Annually
- Never

**6.3** In the event of a data breach, what is the notification protocol to the relevant authority?

- Immediate notification
- Within 24 hours
- Within 72 hours
- Other (please specify)

**Part 7: Cybersecurity**

**7.1** Does your hospital have a cybersecurity system to ensure data protection?

- Yes
- No
- I don’t know

**Part 8: GDPR Compliance**

**8.1** Is your hospital’s data collection and processing system compliant with GDPR regulations?

- Yes
- No
- I don’t know
- Partially

**8.2** Is your staff regularly trained on GDPR compliance?

- Yes
- No

**8.3** How are patient data requests (e.g., right to access) handled under GDPR?

- Standard procedures
- Case-by-case
- Not applicable

**Part 9: Feedback and Follow-up Actions**

**9.1** Do you have a system for collecting patient feedback on data protection practices?

- Yes
- No

**9.2** How often do you review and update data protection policies?

- Monthly
- Quarterly
- Annually
- As needed

**9.3** Would you like to add any comments or feedback regarding your hospital’s data protection experience?

**9.4** [Open question]

**Thank you for taking the time to complete this questionnaire.**
Your responses are valuable for ensuring compliance with data protection laws and improving our practices.
